# Supplementary material for: The Elevational Gradient of Bird Beta Diversity in the Meili Snow Mountains, Yunnan Province, China
Source: MDPI journal article supplement (doi:10.3390/ani13091567), 2023-05-08
Supplement: s1 [file s1]

## SUPPORTING INFORMATION

**Table S1** Elevation bands and species distribution of birds on Meili Snow Mountain.

| Species scientific name            | Common name                     | 2027-<br>2249(m) | 2250-<br>2499(m) | 2500-<br>2749(m) | 2750-<br>2999(m) | 3000-<br>3249(m) | 3250-<br>3499(m) | 3500-<br>3749(m) | 3750-<br>3944(m) |
|------------------------------------|---------------------------------|------------------|------------------|------------------|------------------|------------------|------------------|------------------|------------------|
| <i>Phylloscopus trochiloides</i>   | Greenish Warbler                | 0                | 2                | 4                | 7                | 12               | 13               | 9                | 2                |
| <i>Carpodacus nipalensis</i>       | Dark-breasted Rosefinch         | 0                | 1                | 0                | 0                | 0                | 0                | 0                | 0                |
| <i>Mycerobas carnipes</i>          | White-winged Grosbeak           | 0                | 0                | 0                | 0                | 0                | 0                | 6                | 0                |
| <i>Phylloscopus davisoni</i>       | Kloss's Leaf Warbler            | 0                | 0                | 0                | 0                | 0                | 0                | 2                | 0                |
| <i>Mycerobas melanozanthos</i>     | Spot-winged Grosbeak            | 0                | 0                | 6                | 0                | 8                | 0                | 0                | 0                |
| <i>Garrulax bieti</i>              | White-speckled Laughingthrush   | 0                | 0                | 0                | 0                | 0                | 0                | 2                | 0                |
| <i>Chaimarrornis leucocephalus</i> | White-capped Water Redstart     | 1                | 0                | 1                | 0                | 1                | 0                | 2                | 0                |
| <i>Hodgsonius phoenicuroides</i>   | White-bellied Redstart          | 0                | 0                | 1                | 0                | 0                | 0                | 0                | 0                |
| <i>Chrysolophus amherstiae</i>     | Lady Amherst's Pheasant         | 0                | 9                | 17               | 13               | 3                | 3                | 0                | 1                |
| <i>Rhipidura albicollis</i>        | White-throated Fantail          | 0                | 0                | 1                | 0                | 0                | 0                | 0                | 0                |
| <i>Motacilla alba</i>              | White Wagtail                   | 1                | 0                | 1                | 0                | 6                | 0                | 4                | 0                |
| <i>Yuhina diademata</i>            | White-collared Yuhina           | 0                | 0                | 0                | 4                | 131              | 15               | 6                | 0                |
| <i>Alcippe vinipectus</i>          | White-browed Fulvetta           | 0                | 0                | 6                | 10               | 4                | 46               | 11               | 8                |
| <i>Carpodacus thura</i>            | Chinese White-browed Rosefinch  | 0                | 0                | 0                | 0                | 0                | 0                | 0                | 2                |
| <i>Sitta himalayensis</i>          | White-tailed Nuthatch           | 0                | 0                | 2                | 0                | 0                | 0                | 0                | 0                |
| <i>Picumnus innominatus</i>        | Speckled Piculet                | 0                | 0                | 2                | 1                | 0                | 0                | 0                | 0                |
| <i>Pomatorhinus erythrocnemis</i>  | Black-streaked Scimitar Babbler | 2                | 10               | 7                | 2                | 4                | 0                | 0                | 0                |
| <i>Turdus mupinensis</i>           | Chinese Thrush                  | 0                | 0                | 0                | 0                | 1                | 0                | 0                | 0                |

|                                  |                               |   |    |    |    |     |    |    |    |
|----------------------------------|-------------------------------|---|----|----|----|-----|----|----|----|
| <i>Moupinia poecilotis</i>       | Rufous-tailed Babbler         | 0 | 1  | 0  | 0  | 0   | 0  | 0  | 0  |
| <i>Phoenicurus aureus</i>        | Daurian Redstart              | 6 | 11 | 2  | 16 | 22  | 11 | 0  | 0  |
| <i>Phylloscopus pulcher</i>      | Buff-barred Warbler           | 0 | 0  | 4  | 1  | 23  | 27 | 29 | 35 |
| <i>Garrulax elliotii</i>         | Elliot's Laughingthrush       | 0 | 0  | 6  | 0  | 4   | 62 | 31 | 6  |
| <i>Ficedula strophciata</i>      | Rufous-gorgeted Flycatcher    | 0 | 0  | 0  | 0  | 3   | 2  | 4  | 0  |
| <i>Cuculus canorus</i>           | Common Cuckoo                 | 0 | 0  | 1  | 0  | 0   | 0  | 0  | 0  |
| <i>Parus major</i>               | Cinereous Tit                 | 3 | 29 | 5  | 12 | 0   | 0  | 0  | 0  |
| <i>Cuculus sparverioides</i>     | Large Hawk Cuckoo             | 0 | 0  | 0  | 0  | 5   | 0  | 0  | 0  |
| <i>Garrulax maximus</i>          | Giant Laughingthrush          | 0 | 0  | 0  | 4  | 5   | 18 | 15 | 2  |
| <i>Psittacula derbiana</i>       | Lord Derby's Parakeet         | 0 | 2  | 0  | 2  | 2   | 7  | 5  | 4  |
| <i>Corvus macrorhynchos</i>      | Large-billed Crow             | 3 | 2  | 0  | 2  | 4   | 0  | 7  | 0  |
| <i>Upupa epops</i>               | Common Hoopoe                 | 0 | 0  | 0  | 0  | 1   | 0  | 0  | 0  |
| <i>Pteruthius xanthochlorus</i>  | Green Shrike Babbler          | 0 | 0  | 2  | 0  | 0   | 0  | 0  | 0  |
| <i>Pericrocotus brevirostris</i> | Short-billed Minivet          | 0 | 11 | 64 | 12 | 22  | 4  | 0  | 0  |
| <i>Culicicapa ceylonensis</i>    | Grey-headed Canary Flycatcher | 1 | 0  | 3  | 0  | 0   | 0  | 0  | 0  |
| <i>Accipiter trivirgatus</i>     | Crested Goshawk               | 0 | 0  | 0  | 1  | 0   | 0  | 0  | 0  |
| <i>Certhia himalayana</i>        | Bar-tailed Treecreeper        | 0 | 0  | 0  | 1  | 2   | 0  | 1  | 2  |
| <i>Phylloscopus reguloides</i>   | Claudia's Leaf Warbler        | 4 | 22 | 31 | 26 | 47  | 34 | 35 | 17 |
| <i>Parus dichrous</i>            | Grey-crested Tit              | 0 | 2  | 0  | 0  | 15  | 18 | 10 | 4  |
| <i>Cinclus pallasii</i>          | Brown Dipper                  | 2 | 0  | 1  | 0  | 2   | 0  | 0  | 0  |
| <i>Pyrrhula nipalensis</i>       | Brown Bullfinch               | 0 | 0  | 0  | 0  | 0   | 8  | 0  | 0  |
| <i>Phylloscopus fuscatus</i>     | Dusky Warbler                 | 3 | 12 | 4  | 0  | 8   | 1  | 6  | 1  |
| <i>Parus montanus</i>            | Willow Tit                    | 0 | 7  | 0  | 0  | 0   | 0  | 0  | 0  |
| <i>Garrulax affinis</i>          | Black-faced Laughingthrush    | 0 | 0  | 0  | 0  | 0   | 5  | 2  | 0  |
| <i>Hypsipetes leucocephalus</i>  | Black Bulbul                  | 2 | 21 | 35 | 2  | 8   | 0  | 2  | 0  |
| <i>Parus rubidiventris</i>       | Rufous-vented Tit             | 0 | 0  | 0  | 1  | 12  | 11 | 19 | 18 |
| <i>Delichon nipalensis</i>       | Nepal House Martin            | 0 | 0  | 60 | 0  | 100 | 0  | 0  | 0  |
| <i>Saxicola torquata</i>         | Siberian Stonechat            | 0 | 0  | 0  | 0  | 1   | 0  | 0  | 0  |
| <i>Dicrurus macrocercus</i>      | Black Drongo                  | 0 | 1  | 2  | 0  | 0   | 0  | 0  | 0  |

|                                 |                               |    |     |    |    |    |    |   |   |
|---------------------------------|-------------------------------|----|-----|----|----|----|----|---|---|
| <i>Aegithalos bonvaloti</i>     | Black-browed Bushtit          | 0  | 55  | 36 | 9  | 17 | 19 | 0 | 0 |
| <i>Carduelis ambigua</i>        | Black-headed Greenfinch       | 0  | 32  | 40 | 0  | 0  | 0  | 0 | 0 |
| <i>Pteruthius flaviscapis</i>   | Blyth's Shrike Babbler        | 0  | 0   | 0  | 1  | 0  | 0  | 0 | 0 |
| <i>Luscinia calliope</i>        | Siberian Rubythroat           | 0  | 0   | 0  | 0  | 1  | 0  | 0 | 0 |
| <i>Ficedula parva</i>           | Taiga Flycatcher              | 8  | 0   | 2  | 2  | 1  | 0  | 0 | 0 |
| <i>Carpodacus pulcherrimus</i>  | Himalayan Beautiful Rosefinch | 0  | 0   | 1  | 0  | 25 | 4  | 0 | 0 |
| <i>Rhyacornis fuliginosus</i>   | Plumbeous Water Redstart      | 18 | 1   | 4  | 0  | 5  | 0  | 0 | 0 |
| <i>Tarsiger cyanurus</i>        | Orange-flanked Bluetail       | 0  | 0   | 0  | 0  | 0  | 6  | 7 | 4 |
| <i>Dicaeum ignipectus</i>       | Fire-breasted Flowerpecker    | 2  | 21  | 4  | 3  | 3  | 0  | 0 | 0 |
| <i>Pyrhacorax pyrrhacorax</i>   | Red-billed Chough             | 2  | 0   | 0  | 0  | 2  | 0  | 0 | 0 |
| <i>Conostoma aemodium</i>       | Great Parrotbill              | 0  | 0   | 0  | 0  | 0  | 0  | 0 | 8 |
| <i>Phylloscopus affinis</i>     | Tickell's Leaf Warbler        | 0  | 0   | 0  | 0  | 0  | 0  | 2 | 1 |
| <i>Rhipidura hypoxantha</i>     | Citrine Canary-Flycatcher     | 0  | 0   | 0  | 2  | 0  | 1  | 4 | 0 |
| <i>Dicaeum melanozanthum</i>    | Yellow-bellied Flowerpecker   | 0  | 0   | 1  | 1  | 2  | 0  | 0 | 0 |
| <i>Emberiza elegans</i>         | Yellow-throated Bunting       | 0  | 5   | 2  | 2  | 1  | 0  | 0 | 0 |
| <i>Mycerobas affinis</i>        | Collared Grosbeak             | 0  | 0   | 0  | 0  | 0  | 0  | 0 | 5 |
| <i>Dendrocopos darjellensis</i> | Darjeeling Woodpecker         | 0  | 0   | 0  | 0  | 0  | 2  | 0 | 0 |
| <i>Sylviparus modestus</i>      | Yellow-browed Tit             | 0  | 0   | 2  | 11 | 0  | 0  | 0 | 0 |
| <i>Phylloscopus inornatus</i>   | Yellow-browed Warbler         | 0  | 9   | 6  | 10 | 5  | 16 | 1 | 4 |
| <i>Pycnonotus xanthorrhous</i>  | Brown-breasted Bulbul         | 45 | 113 | 43 | 0  | 0  | 0  | 0 | 0 |
| <i>Phylloscopus proregulus</i>  | Pallas's Leaf Warbler         | 1  | 0   | 7  | 10 | 17 | 38 | 6 | 5 |
| <i>Lanius tephronotus</i>       | Grey-backed Shrike            | 0  | 3   | 5  | 1  | 8  | 0  | 0 | 0 |
| <i>Garrulax cineraceus</i>      | Moustached Laughingthrush     | 0  | 2   | 5  | 0  | 0  | 0  | 0 | 0 |
| <i>Zosterops palpebrosa</i>     | Oriental White-eye            | 0  | 7   | 14 | 0  | 0  | 0  | 0 | 0 |
| <i>Pericrocotus solaris</i>     | Grey-chinned Minivet          | 0  | 4   | 0  | 0  | 0  | 0  | 0 | 0 |
| <i>Motacilla cinerea</i>        | Grey Wagtail                  | 1  | 0   | 3  | 1  | 3  | 0  | 1 | 0 |
| <i>Ficedula tricolor</i>        | Slaty-blue Flycatcher         | 0  | 0   | 1  | 0  | 0  | 0  | 1 | 0 |
| <i>Saxicola ferrea</i>          | Grey Bushchat                 | 0  | 0   | 3  | 0  | 0  | 0  | 0 | 0 |
| <i>Emberiza cia</i>             | Godlewski's Bunting           | 7  | 18  | 5  | 2  | 6  | 2  | 0 | 0 |

|                                |                          |    |    |    |    |    |    |    |   |
|--------------------------------|--------------------------|----|----|----|----|----|----|----|---|
| <i>Turdus rubrocanus</i>       | Chestnut Thrush          | 0  | 0  | 0  | 0  | 1  | 1  | 3  | 3 |
| <i>Pyrhula erythaca</i>        | Grey-headed Bullfinch    | 0  | 0  | 2  | 13 | 4  | 3  | 26 | 9 |
| <i>Picus canus</i>             | Grey-headed Woodpecker   | 0  | 0  | 0  | 2  | 2  | 1  | 0  | 0 |
| <i>Liocichla phoenicea</i>     | Red-faced Liocichla      | 0  | 1  | 0  | 0  | 0  | 0  | 0  | 0 |
| <i>Cephalopyrus flammiceps</i> | Fire-capped Tit          | 0  | 0  | 0  | 5  | 0  | 0  | 0  | 0 |
| <i>Certhia hodgsoni</i>        | Hodgson's Treecreeper    | 0  | 0  | 0  | 0  | 4  | 4  | 9  | 2 |
| <i>Phylloscopus borealis</i>   | Arctic Warbler           | 0  | 0  | 0  | 2  | 0  | 0  | 0  | 0 |
| <i>Troglodytes troglodytes</i> | Eurasian Wren            | 0  | 0  | 0  | 0  | 0  | 0  | 4  | 2 |
| <i>Seicercus burkii</i>        | Green-crowned Warbler    | 0  | 1  | 4  | 7  | 7  | 2  | 5  | 1 |
| <i>Tarsiger chrysaeus</i>      | Golden Bush Robin        | 0  | 0  | 0  | 0  | 0  | 1  | 0  | 0 |
| <i>Phoenicurus frontalis</i>   | Blue-fronted Redstart    | 0  | 2  | 0  | 0  | 0  | 0  | 10 | 0 |
| <i>Aethopyga gouldiae</i>      | Mrs Gould's Sunbird      | 8  | 8  | 19 | 12 | 10 | 18 | 10 | 2 |
| <i>Monticola solitarius</i>    | Blue Rock Thrush         | 2  | 0  | 0  | 0  | 0  | 0  | 0  | 0 |
| <i>Luscinia brunnea</i>        | Indian Blue Robin        | 0  | 0  | 0  | 1  | 1  | 0  | 0  | 0 |
| <i>Sitta nagaensis</i>         | Chestnut-vented Nuthatch | 0  | 1  | 10 | 11 | 26 | 15 | 9  | 0 |
| <i>Parus monticolus</i>        | Green-backed Tit         | 0  | 4  | 14 | 10 | 15 | 0  | 3  | 0 |
| <i>Aethopyga nipalensis</i>    | Green-tailed Sunbird     | 0  | 0  | 0  | 0  | 0  | 0  | 1  | 0 |
| <i>Passer montanus</i>         | Eurasian Tree Sparrow    | 0  | 58 | 0  | 0  | 0  | 0  | 0  | 0 |
| <i>Parus ater</i>              | Coal Tit                 | 0  | 0  | 0  | 0  | 4  | 75 | 2  | 0 |
| <i>Carpodacus erythrinus</i>   | Common Rosefinch         | 0  | 8  | 11 | 0  | 40 | 0  | 0  | 0 |
| <i>Streptopelia orientalis</i> | Oriental Turtle Dove     | 6  | 39 | 21 | 9  | 20 | 7  | 4  | 0 |
| <i>Niltava banyumas</i>        | Hill Blue Flycatcher     | 3  | 0  | 2  | 2  | 0  | 0  | 0  | 0 |
| <i>Anthus sylvanus</i>         | Upland Pipit             | 0  | 1  | 0  | 0  | 0  | 0  | 0  | 0 |
| <i>Passer rutilans</i>         | Russet Sparrow           | 32 | 41 | 0  | 0  | 0  | 0  | 0  | 0 |
| <i>Pucrasia macrolopha</i>     | Koklass Pheasant         | 0  | 0  | 0  | 0  | 0  | 1  | 0  | 0 |
| <i>Anthus hodgsoni</i>         | Olive-backed Pipit       | 0  | 0  | 0  | 0  | 23 | 0  | 0  | 0 |
| <i>Accipiter virgatus</i>      | Besra                    | 0  | 0  | 0  | 0  | 0  | 1  | 0  | 0 |
| <i>Garrulus glandarius</i>     | Eurasian Jay             | 0  | 0  | 0  | 1  | 0  | 0  | 0  | 0 |
| <i>Muscicapa thalassina</i>    | Verditer Flycatcher      | 0  | 1  | 0  | 0  | 1  | 0  | 0  | 0 |
| <i>Turdus merula</i>           | Chinese Blackbird        | 0  | 0  | 0  | 2  | 0  | 0  | 0  | 0 |

|                                  |                                  |    |    |    |    |     |    |    |   |
|----------------------------------|----------------------------------|----|----|----|----|-----|----|----|---|
| <i>Phylloscopus magnirostris</i> | Large-billed Leaf Warbler        | 0  | 0  | 1  | 0  | 1   | 4  | 0  | 0 |
| <i>Pica pica</i>                 | Common Magpie                    | 2  | 5  | 0  | 0  | 0   | 0  | 0  | 0 |
| <i>Ficedula westermanni</i>      | Little Pied Flycatcher           | 0  | 1  | 0  | 0  | 0   | 0  | 0  | 0 |
| <i>Corvus corone</i>             | Carrion Crow                     | 3  | 0  | 2  | 0  | 3   | 2  | 0  | 0 |
| <i>Treron sphenura</i>           | Wedge-tailed Green Pigeon        | 5  | 2  | 2  | 0  | 2   | 0  | 0  | 0 |
| <i>Nucifraga caryocatactes</i>   | Spotted Nutcracker               | 0  | 6  | 36 | 18 | 11  | 5  | 1  | 1 |
| <i>Ficedula hodgsonii</i>        | Slaty-backed Flycatcher          | 0  | 0  | 1  | 2  | 4   | 2  | 0  | 0 |
| <i>Columba leuconota</i>         | Snow Pigeon                      | 0  | 2  | 0  | 2  | 129 | 0  | 18 | 0 |
| <i>Ithaginis cruentus</i>        | Blood Pheasant                   | 0  | 0  | 0  | 0  | 0   | 0  | 2  | 0 |
| <i>Columba rupestris</i>         | Hill Pigeon                      | 48 | 4  | 11 | 0  | 0   | 0  | 0  | 0 |
| <i>Ptyonoprogne rupestris</i>    | Eurasian Crag Martin             | 9  | 28 | 0  | 0  | 0   | 0  | 0  | 0 |
| <i>Ficedula sapphira</i>         | Sapphire Flycatcher              | 0  | 0  | 0  | 1  | 0   | 0  | 0  | 0 |
| <i>Zoothera dixonii</i>          | Long-tailed Thrush               | 0  | 0  | 0  | 0  | 0   | 1  | 0  | 0 |
| <i>Uragus sibiricus</i>          | Long-tailed Rosefinch            | 0  | 4  | 1  | 3  | 0   | 0  | 0  | 0 |
| <i>Pericrocotus ethologus</i>    | Long-tailed Minivet              | 0  | 0  | 0  | 0  | 2   | 2  | 6  | 0 |
| <i>Parus palustris</i>           | Marsh Tit                        | 0  | 3  | 2  | 6  | 12  | 15 | 0  | 0 |
| <i>Myiophonus caeruleus</i>      | Blue Whistling Thrush            | 6  | 3  | 3  | 3  | 2   | 0  | 0  | 0 |
| <i>Phylloscopus subaffinis</i>   | Buff-throated Warbler            | 0  | 2  | 0  | 0  | 0   | 0  | 2  | 0 |
| <i>Niltava sundara</i>           | Rufous-bellied Niltava           | 0  | 0  | 0  | 1  | 0   | 0  | 1  | 0 |
| <i>Dendrocopos hyperythrus</i>   | Rufous-bellied Woodpecker        | 0  | 0  | 0  | 0  | 1   | 1  | 2  | 3 |
| <i>Pomatorhinus ruficollis</i>   | Streak-breasted Scimitar Babbler | 0  | 4  | 8  | 4  | 0   | 0  | 0  | 0 |
| <i>Phylloscopus armandii</i>     | Yellow-streaked Warbler          | 0  | 0  | 2  | 0  | 2   | 0  | 0  | 0 |
| <i>Alcippe ruficapilla</i>       | Spectacled Fulvetta              | 0  | 3  | 0  | 0  | 0   | 0  | 0  | 0 |
| <i>Yuhina occipitalis</i>        | Rufous-vented Yuhina             | 0  | 0  | 0  | 0  | 10  | 0  | 41 | 4 |
| <i>Ficedula hyperythra</i>       | Snowy-browed Flycatcher          | 0  | 0  | 0  | 0  | 4   | 0  | 1  | 0 |
| <i>Prunella strophiata</i>       | Rufous-breasted Accentor         | 0  | 0  | 0  | 0  | 0   | 0  | 11 | 0 |

**Table S2** Functional traits of each bird species on Meili Snow Mountain.

| Scientific name                 | Common name               | Diet -Inv | Diet- Vend | Diet- Vect | Diet- Vfish | Diet- Vunk | Diet- Scav | Diet- Fruit | Diet- Nect | Diet- Seed | Diet- Plant O | ForStrat- watbelowsurf | ForStrat- wataroundsurf | ForStrat -ground | ForStrat- understory | ForStrat- midhigh | ForStrat -canopy | ForStrat- aerial | BodyMass-Value |
|---------------------------------|---------------------------|-----------|------------|------------|-------------|------------|------------|-------------|------------|------------|---------------|------------------------|-------------------------|------------------|----------------------|-------------------|------------------|------------------|----------------|
| <i>Ithaginis cruentus</i>       | Blood Pheasant            | 20        | 0          | 0          | 0           | 0          | 0          | 20          | 0          | 10         | 50            | 0                      | 0                       | 80               | 20                   | 0                 | 0                | 0                | 530.67         |
| <i>Pucrasia macrolopha</i>      | Koklass Pheasant          | 20        | 0          | 0          | 0           | 0          | 0          | 30          | 0          | 30         | 20            | 0                      | 0                       | 100              | 0                    | 0                 | 0                | 0                | 1050.47        |
| <i>Chrysolophus amherstiae</i>  | Lady Amherst's Pheasant   | 40        | 0          | 0          | 0           | 0          | 0          | 10          | 0          | 0          | 50            | 0                      | 0                       | 100              | 0                    | 0                 | 0                | 0                | 732.47         |
| <i>Picumus innominatus</i>      | Speckled Piculet          | 100       | 0          | 0          | 0           | 0          | 0          | 0           | 0          | 0          | 0             | 0                      | 0                       | 0                | 50                   | 50                | 0                | 0                | 10.2           |
| <i>Dendrocopos hyperythrus</i>  | Rufous-bellied Woodpecker | 70        | 0          | 0          | 0           | 0          | 0          | 0           | 20         | 0          | 10            | 0                      | 0                       | 0                | 0                    | 50                | 50               | 0                | 46.49          |
| <i>Dendrocopos darjellensis</i> | Darjeeling Woodpecker     | 100       | 0          | 0          | 0           | 0          | 0          | 0           | 0          | 0          | 0             | 0                      | 0                       | 0                | 33                   | 33                | 33               | 0                | 70.66          |
| <i>Picus canus</i>              | Grey-headed Woodpecker    | 70        | 0          | 0          | 0           | 0          | 0          | 10          | 10         | 10         | 0             | 0                      | 0                       | 100              | 0                    | 0                 | 0                | 0                | 137            |
| <i>Upupa epops</i>              | Common Hoopoe             | 80        | 0          | 20         | 0           | 0          | 0          | 0           | 0          | 0          | 0             | 0                      | 0                       | 100              | 0                    | 0                 | 0                | 0                | 66.93          |
| <i>Cuculus sparverioides</i>    | Large Hawk Cuckoo         | 90        | 0          | 0          | 0           | 0          | 0          | 10          | 0          | 0          | 0             | 0                      | 0                       | 0                | 0                    | 40                | 60               | 0                | 151            |
| <i>Cuculus canorus</i>          | Common Cuckoo             | 90        | 0          | 0          | 0           | 0          | 0          | 10          | 0          | 0          | 0             | 0                      | 0                       | 20               | 20                   | 40                | 20               | 0                | 111.36         |
| <i>Psittacula derbiana</i>      | Lord Derby's Parakeet     | 0         | 0          | 0          | 0           | 0          | 0          | 50          | 0          | 50         | 0             | 0                      | 0                       | 0                | 33                   | 33                | 33               | 0                | 251            |
| <i>Columba rupestris</i>        | Hill Pigeon               | 10        | 0          | 0          | 0           | 0          | 0          | 0           | 0          | 70         | 20            | 0                      | 0                       | 80               | 20                   | 0                 | 0                | 0                | 245.41         |
| <i>Columba leuconota</i>        | Snow Pigeon               | 0         | 0          | 0          | 0           | 0          | 0          | 0           | 0          | 70         | 30            | 0                      | 0                       | 80               | 20                   | 0                 | 0                | 0                | 284            |
| <i>Streptopelia orientalis</i>  | Oriental Turtle Dove      | 0         | 0          | 0          | 0           | 0          | 0          | 20          | 0          | 40         | 40            | 0                      | 0                       | 100              | 0                    | 0                 | 0                | 0                | 232.94         |
| <i>Treron sphenurus</i>         | Rusty Tinamou             | 0         | 0          | 0          | 0           | 0          | 0          | 100         | 0          | 0          | 0             | 0                      | 0                       | 20               | 0                    | 40                | 40               | 0                | 210            |
| <i>Accipiter trivirgatus</i>    | Crested Goshawk           | 20        | 60         | 20         | 0           | 0          | 0          | 0           | 0          | 0          | 0             | 0                      | 0                       | 33               | 33                   | 33                | 0                | 0                | 265.04         |
| <i>Accipiter virgatus</i>       | Besra                     | 20        | 60         | 20         | 0           | 0          | 0          | 0           | 0          | 0          | 0             | 0                      | 0                       | 50               | 0                    | 30                | 20               | 0                | 116.99         |
| <i>Lanius tephronotus</i>       | Grey-backed Shrike        | 80        | 10         | 10         | 0           | 0          | 0          | 0           | 0          | 0          | 0             | 0                      | 0                       | 100              | 0                    | 0                 | 0                | 0                | 46.35          |
| <i>Garrulus glandarius</i>      | Eurasian Jay              | 40        | 10         | 0          | 0           | 0          | 0          | 30          | 0          | 20         | 0             | 0                      | 0                       | 60               | 20                   | 20                | 0                | 0                | 159.46         |

|                                  |                            |     |    |    |   |    |    |    |    |    |    |    |    |     |    |    |     |    |        |
|----------------------------------|----------------------------|-----|----|----|---|----|----|----|----|----|----|----|----|-----|----|----|-----|----|--------|
| <i>Pica pica</i>                 | Common Magpie              | 20  | 20 | 20 | 0 | 0  | 20 | 10 | 0  | 10 | 0  | 0  | 0  | 70  | 10 | 10 | 0   | 10 | 217.48 |
| <i>Nucifraga caryocatactes</i>   | Spotted Nutcracker         | 30  | 10 | 0  | 0 | 0  | 0  | 0  | 0  | 60 | 0  | 0  | 0  | 40  | 20 | 20 | 20  | 0  | 182.51 |
| <i>Pyrrhocorax pyrrhocorax</i>   | Red-billed Chough          | 50  | 0  | 0  | 0 | 10 | 10 | 10 | 0  | 20 | 0  | 0  | 0  | 70  | 0  | 30 | 0   | 0  | 276.68 |
| <i>Corvus corone</i>             | Carriion Crow              | 30  | 20 | 20 | 0 | 0  | 20 | 0  | 0  | 10 | 0  | 0  | 0  | 90  | 0  | 0  | 0   | 10 | 570    |
| <i>Corvus macrorhynchos</i>      | Large-billed Crow          | 20  | 10 | 10 | 0 | 0  | 30 | 20 | 0  | 10 | 0  | 0  | 0  | 100 | 0  | 0  | 0   | 0  | 513.14 |
| <i>Pericrocotus solaris</i>      | Grey-chinned Minivet       | 100 | 0  | 0  | 0 | 0  | 0  | 0  | 0  | 0  | 0  | 0  | 0  | 0   | 0  | 0  | 100 | 0  | 14.5   |
| <i>Pericrocotus ethologus</i>    | Long-tailed Minivet        | 80  | 0  | 0  | 0 | 0  | 0  | 10 | 0  | 0  | 10 | 0  | 0  | 0   | 0  | 0  | 80  | 20 | 18.97  |
| <i>Pericrocotus brevirostris</i> | Short-billed Minivet       | 80  | 0  | 0  | 0 | 0  | 0  | 0  | 0  | 0  | 20 | 0  | 0  | 0   | 33 | 33 | 33  | 0  | 16.49  |
| <i>Chelidorhynch hypoxantha</i>  | Slaty-breasted Tinamou     | 100 | 0  | 0  | 0 | 0  | 0  | 0  | 0  | 0  | 0  | 0  | 0  | 10  | 40 | 40 | 10  | 0  | 14.7   |
| <i>Rhipidura albicollis</i>      | White-throated Fantail     | 100 | 0  | 0  | 0 | 0  | 0  | 0  | 0  | 0  | 0  | 0  | 0  | 0   | 40 | 40 | 20  | 0  | 12.9   |
| <i>Dicrurus macrocercus</i>      | Black Drongo               | 40  | 10 | 10 | 0 | 0  | 10 | 0  | 20 | 10 | 0  | 0  | 0  | 0   | 0  | 33 | 33  | 33 | 48.3   |
| <i>Cinclus pallasii</i>          | Brown Dipper               | 100 | 0  | 0  | 0 | 0  | 0  | 0  | 0  | 0  | 0  | 40 | 40 | 20  | 0  | 0  | 0   | 0  | 76     |
| <i>Monticola solitarius</i>      | Blue Rock Thrush           | 40  | 10 | 20 | 0 | 0  | 0  | 20 | 0  | 10 | 0  | 0  | 0  | 80  | 0  | 20 | 0   | 0  | 53.65  |
| <i>Myophonus caeruleus</i>       | Brazilian Tinamou          | 60  | 0  | 10 | 0 | 0  | 0  | 30 | 0  | 0  | 0  | 0  | 0  | 100 | 0  | 0  | 0   | 0  | 157.98 |
| <i>Zoothera dixonii</i>          | Long-tailed Thrush         | 70  | 0  | 0  | 0 | 0  | 0  | 20 | 0  | 10 | 0  | 0  | 0  | 100 | 0  | 0  | 0   | 0  | 90     |
| <i>Turdus merula</i>             | Chinese Blackbird          | 50  | 0  | 0  | 0 | 10 | 0  | 20 | 0  | 20 | 0  | 0  | 0  | 60  | 20 | 20 | 0   | 0  | 102.73 |
| <i>Turdus rubrocanus</i>         | Chestnut Thrush            | 50  | 0  | 0  | 0 | 0  | 0  | 50 | 0  | 0  | 0  | 0  | 0  | 60  | 0  | 20 | 20  | 0  | 92.2   |
| <i>Turdus mupinensis</i>         | Chinese Thrush             | 40  | 0  | 0  | 0 | 0  | 0  | 50 | 0  | 10 | 0  | 0  | 0  | 40  | 20 | 20 | 20  | 0  | 62.54  |
| <i>Ficedula hodgsonii</i>        | Slaty-backed Flycatcher    | 50  | 0  | 0  | 0 | 0  | 0  | 50 | 0  | 0  | 0  | 0  | 0  | 0   | 50 | 50 | 0   | 0  | 10     |
| <i>Ficedula strophilata</i>      | Rufous-gorgeted Flycatcher | 100 | 0  | 0  | 0 | 0  | 0  | 0  | 0  | 0  | 0  | 0  | 0  | 10  | 40 | 50 | 0   | 0  | 12.84  |
| <i>Ficedula hyperythra</i>       | Snowy-browed Flycatcher    | 90  | 0  | 0  | 0 | 0  | 0  | 10 | 0  | 0  | 0  | 0  | 0  | 0   | 80 | 20 | 0   | 0  | 8.2    |
| <i>Ficedula westermanni</i>      | Little Pied Flycatcher     | 100 | 0  | 0  | 0 | 0  | 0  | 0  | 0  | 0  | 0  | 0  | 0  | 0   | 0  | 40 | 60  | 0  | 7.8    |
| <i>Ficedula tricolor</i>         | Slaty-blue Flycatcher      | 100 | 0  | 0  | 0 | 0  | 0  | 0  | 0  | 0  | 0  | 0  | 0  | 33  | 33 | 33 | 0   | 0  | 8.26   |
| <i>Ficedula sapphira</i>         | Sapphire Flycatcher        | 100 | 0  | 0  | 0 | 0  | 0  | 0  | 0  | 0  | 0  | 0  | 0  | 0   | 50 | 50 | 0   | 0  | 7.8    |

|                                    |                               |     |   |    |    |    |   |    |    |    |    |   |   |     |    |    |    |   |       |
|------------------------------------|-------------------------------|-----|---|----|----|----|---|----|----|----|----|---|---|-----|----|----|----|---|-------|
| <i>Eumyias thalassinus</i>         | Tabon Megapode                | 70  | 0 | 0  | 0  | 0  | 0 | 30 | 0  | 0  | 0  | 0 | 0 | 20  | 0  | 40 | 40 | 0 | 18.1  |
| <i>Niltava sundara</i>             | Rufous-bellied Niltava        | 80  | 0 | 0  | 0  | 0  | 0 | 20 | 0  | 0  | 0  | 0 | 0 | 50  | 50 | 0  | 0  | 0 | 21.1  |
| <i>Cyornis banyumas</i>            | Taczanowski's Tinamou         | 100 | 0 | 0  | 0  | 0  | 0 | 0  | 0  | 0  | 0  | 0 | 0 | 0   | 50 | 50 | 0  | 0 | 14.5  |
| <i>Culicicapa ceylonensis</i>      | Grey-headed Canary Flycatcher | 100 | 0 | 0  | 0  | 0  | 0 | 0  | 0  | 0  | 0  | 0 | 0 | 0   | 30 | 30 | 40 | 0 | 7.7   |
| <i>Luscinia calliope</i>           | Siberian Rubythroat           | 80  | 0 | 0  | 0  | 0  | 0 | 0  | 0  | 0  | 20 | 0 | 0 | 50  | 50 | 0  | 0  | 0 | 18.5  |
| <i>Luscinia brunnea</i>            | Indian Blue Robin             | 100 | 0 | 0  | 0  | 0  | 0 | 0  | 0  | 0  | 0  | 0 | 0 | 70  | 30 | 0  | 0  | 0 | 17.5  |
| <i>Tarsiger cyanurus</i>           | Orange-flanked Bluetail       | 80  | 0 | 0  | 0  | 0  | 0 | 10 | 0  | 10 | 0  | 0 | 0 | 50  | 50 | 0  | 0  | 0 | 13.43 |
| <i>Tarsiger chrysaeus</i>          | Golden Bush Robin             | 100 | 0 | 0  | 0  | 0  | 0 | 0  | 0  | 0  | 0  | 0 | 0 | 50  | 50 | 0  | 0  | 0 | 13.8  |
| <i>Phoenicurus aureus</i>          | Daurian Redstart              | 60  | 0 | 0  | 0  | 0  | 0 | 0  | 0  | 30 | 10 | 0 | 0 | 50  | 50 | 0  | 0  | 0 | 16.2  |
| <i>Phoenicurus frontalis</i>       | Blue-fronted Redstart         | 100 | 0 | 0  | 0  | 0  | 0 | 0  | 0  | 0  | 0  | 0 | 0 | 0   | 33 | 33 | 33 | 0 | 15.77 |
| <i>Chaimarrornis leucocephalus</i> | White-capped Water Redstart   | 80  | 0 | 0  | 0  | 0  | 0 | 10 | 0  | 10 | 0  | 0 | 0 | 80  | 20 | 0  | 0  | 0 | 30.04 |
| <i>Rhyacornis fuliginosa</i>       | Southern Cassowary            | 80  | 0 | 0  | 0  | 0  | 0 | 10 | 0  | 10 | 0  | 0 | 0 | 50  | 25 | 25 | 0  | 0 | 20.33 |
| <i>Hodgsonius phaenicuroides</i>   | Grey-headed Chachalaca        | 60  | 0 | 0  | 0  | 0  | 0 | 40 | 0  | 0  | 0  | 0 | 0 | 100 | 0  | 0  | 0  | 0 | 21.1  |
| <i>Saxicola torquatus</i>          | Sand Partridge                | 70  | 0 | 0  | 0  | 10 | 0 | 10 | 0  | 10 | 0  | 0 | 0 | 100 | 0  | 0  | 0  | 0 | 14.09 |
| <i>Saxicola ferreus</i>            | White-bellied Chachalaca      | 90  | 0 | 0  | 0  | 0  | 0 | 0  | 0  | 10 | 0  | 0 | 0 | 80  | 10 | 10 | 0  | 0 | 14.7  |
| <i>Sitta nagaensis</i>             | Chestnut-vented Nuthatch      | 70  | 0 | 0  | 0  | 0  | 0 | 0  | 0  | 30 | 0  | 0 | 0 | 60  | 20 | 20 | 0  | 0 | 14.7  |
| <i>Sitta himalayensis</i>          | White-tailed Nuthatch         | 70  | 0 | 0  | 0  | 0  | 0 | 0  | 0  | 30 | 0  | 0 | 0 | 0   | 20 | 50 | 30 | 0 | 14.28 |
| <i>Certhia himalayana</i>          | Bar-tailed Treecreeper        | 90  | 0 | 0  | 0  | 0  | 0 | 0  | 0  | 10 | 0  | 0 | 0 | 10  | 30 | 30 | 30 | 0 | 8.8   |
| <i>Troglodytes troglodytes</i>     | Eurasian Wren                 | 60  | 0 | 10 | 10 | 0  | 0 | 10 | 0  | 10 | 0  | 0 | 0 | 50  | 50 | 0  | 0  | 0 | 9.74  |
| <i>Cephalopyrus flammiceps</i>     | Fire-capped Tit               | 60  | 0 | 0  | 0  | 0  | 0 | 0  | 20 | 0  | 20 | 0 | 0 | 0   | 20 | 40 | 40 | 0 | 7     |
| <i>Parus palustris</i>             | Marsh Tit                     | 50  | 0 | 0  | 0  | 0  | 0 | 20 | 0  | 20 | 10 | 0 | 0 | 0   | 20 | 80 | 0  | 0 | 11.14 |
| <i>Parus montanus</i>              | Willow Tit                    | 60  | 0 | 0  | 0  | 0  | 0 | 20 | 0  | 20 | 0  | 0 | 0 | 0   | 20 | 80 | 0  | 0 | 11.1  |
| <i>Parus rubidiventris</i>         | Rufous-vented Tit             | 80  | 0 | 0  | 0  | 0  | 0 | 0  | 0  | 20 | 0  | 0 | 0 | 0   | 0  | 40 | 60 | 0 | 11.83 |



|                                  |                            |     |   |   |   |   |    |    |    |    |    |   |   |     |    |     |    |    |       |
|----------------------------------|----------------------------|-----|---|---|---|---|----|----|----|----|----|---|---|-----|----|-----|----|----|-------|
| <i>Parus ater</i>                | Coal Tit                   | 40  | 0 | 0 | 0 | 0 | 10 | 0  | 10 | 20 | 20 | 0 | 0 | 100 | 0  | 0   | 0  | 0  | 9.2   |
| <i>Parus dichrous</i>            | Grey-crested Tit           | 100 | 0 | 0 | 0 | 0 | 0  | 0  | 0  | 0  | 0  | 0 | 0 | 0   | 20 | 80  | 0  | 0  | 13.8  |
| <i>Parus major</i>               | Cinereous Tit              | 40  | 0 | 0 | 0 | 0 | 10 | 20 | 10 | 20 | 0  | 0 | 0 | 0   | 20 | 60  | 20 | 0  | 16.25 |
| <i>Parus monticolus</i>          | Green-backed Tit           | 50  | 0 | 0 | 0 | 0 | 0  | 20 | 0  | 20 | 10 | 0 | 0 | 0   | 30 | 30  | 40 | 0  | 13.95 |
| <i>Sylviparus modestus</i>       | Yellow-browed Tit          | 80  | 0 | 0 | 0 | 0 | 0  | 0  | 0  | 20 | 0  | 0 | 0 | 0   | 20 | 50  | 30 | 0  | 7.14  |
| <i>Aegithalos iouschistos</i>    | Solitary Tinamou           | 70  | 0 | 0 | 0 | 0 | 0  | 0  | 0  | 0  | 30 | 0 | 0 | 0   | 50 | 0   | 50 | 0  | 7     |
| <i>Hirundo rupestris</i>         | Chestnut-bellied Guan      | 100 | 0 | 0 | 0 | 0 | 0  | 0  | 0  | 0  | 0  | 0 | 0 | 40  | 40 | 20  | 0  | 0  | 20.4  |
| <i>Delichon nipalense</i>        | Chestnut-winged Chachalaca | 100 | 0 | 0 | 0 | 0 | 0  | 0  | 0  | 0  | 0  | 0 | 0 | 0   | 0  | 0   | 20 | 80 | 14.96 |
| <i>Pycnonotus xanthorrhous</i>   | Brown-breasted Bulbul      | 20  | 0 | 0 | 0 | 0 | 0  | 60 | 0  | 20 | 0  | 0 | 0 | 50  | 50 | 0   | 0  | 0  | 26.9  |
| <i>Hypsipetes leucocephalus</i>  | Black Bulbul               | 20  | 0 | 0 | 0 | 0 | 0  | 40 | 20 | 0  | 20 | 0 | 0 | 0   | 10 | 20  | 70 | 0  | 51.8  |
| <i>Zosterops palpebrosus</i>     | Little Chachalaca          | 40  | 0 | 0 | 0 | 0 | 0  | 20 | 10 | 10 | 20 | 0 | 0 | 0   | 0  | 30  | 70 | 0  | 8.6   |
| <i>Phylloscopus fuscatus</i>     | Dusky Warbler              | 80  | 0 | 0 | 0 | 0 | 0  | 0  | 0  | 20 | 0  | 0 | 0 | 0   | 50 | 50  | 0  | 0  | 8.74  |
| <i>Phylloscopus affinis</i>      | Tickell's Leaf Warbler     | 100 | 0 | 0 | 0 | 0 | 0  | 0  | 0  | 0  | 0  | 0 | 0 | 50  | 50 | 0   | 0  | 0  | 6.96  |
| <i>Phylloscopus subaffinis</i>   | Buff-throated Warbler      | 100 | 0 | 0 | 0 | 0 | 0  | 0  | 0  | 0  | 0  | 0 | 0 | 30  | 10 | 30  | 30 | 0  | 6.2   |
| <i>Phylloscopus armandii</i>     | Yellow-streaked Warbler    | 100 | 0 | 0 | 0 | 0 | 0  | 0  | 0  | 0  | 0  | 0 | 0 | 33  | 33 | 33  | 0  | 0  | 9.4   |
| <i>Phylloscopus pulcher</i>      | Buff-barred Warbler        | 80  | 0 | 0 | 0 | 0 | 0  | 0  | 20 | 0  | 0  | 0 | 0 | 0   | 0  | 40  | 60 | 0  | 6.8   |
| <i>Phylloscopus proregulus</i>   | Pallas's Leaf Warbler      | 100 | 0 | 0 | 0 | 0 | 0  | 0  | 0  | 0  | 0  | 0 | 0 | 0   | 50 | 0   | 50 | 0  | 6     |
| <i>Phylloscopus inornatus</i>    | Yellow-browed Warbler      | 90  | 0 | 0 | 0 | 0 | 0  | 0  | 0  | 10 | 0  | 0 | 0 | 10  | 30 | 30  | 30 | 0  | 6.59  |
| <i>Phylloscopus borealis</i>     | Arctic Warbler             | 100 | 0 | 0 | 0 | 0 | 0  | 0  | 0  | 0  | 0  | 0 | 0 | 0   | 50 | 0   | 50 | 0  | 10.89 |
| <i>Phylloscopus trochiloides</i> | Greenish Warbler           | 80  | 0 | 0 | 0 | 0 | 0  | 10 | 0  | 10 | 0  | 0 | 0 | 0   | 33 | 33  | 33 | 0  | 8.05  |
| <i>Phylloscopus magnirostris</i> | Large-billed Leaf Warbler  | 100 | 0 | 0 | 0 | 0 | 0  | 0  | 0  | 0  | 0  | 0 | 0 | 0   | 0  | 20  | 80 | 0  | 11.6  |
| <i>Seicercus burkii</i>          | Green-crowned Warbler      | 100 | 0 | 0 | 0 | 0 | 0  | 0  | 0  | 0  | 0  | 0 | 0 | 0   | 0  | 100 | 0  | 0  | 7.3   |
| <i>Garrulax cineraceus</i>       | Moustached Laughingthrush  | 70  | 0 | 0 | 0 | 0 | 0  | 20 | 0  | 10 | 0  | 0 | 0 | 100 | 0  | 0   | 0  | 0  | 48.95 |

|                                   |                                  |     |   |   |   |   |   |    |    |    |    |   |   |     |    |    |    |    |       |
|-----------------------------------|----------------------------------|-----|---|---|---|---|---|----|----|----|----|---|---|-----|----|----|----|----|-------|
| <i>Garrulax bieti</i>             | White-speckled Laughingthrush    | 50  | 0 | 0 | 0 | 0 | 0 | 50 | 0  | 0  | 0  | 0 | 0 | 100 | 0  | 0  | 0  | 0  | 78.64 |
| <i>Garrulax maximus</i>           | Giant Laughingthrush             | 80  | 0 | 0 | 0 | 0 | 0 | 0  | 0  | 0  | 20 | 0 | 0 | 80  | 10 | 10 | 0  | 0  | 78.64 |
| <i>Garrulax elliotii</i>          | Elliot's Laughingthrush          | 80  | 0 | 0 | 0 | 0 | 0 | 0  | 0  | 0  | 20 | 0 | 0 | 50  | 50 | 0  | 0  | 0  | 45    |
| <i>Garrulax affinis</i>           | Black-faced Laughingthrush       | 30  | 0 | 0 | 0 | 0 | 0 | 70 | 0  | 0  | 0  | 0 | 0 | 40  | 40 | 20 | 0  | 0  | 72.66 |
| <i>Liocichla phoenicea</i>        | Red-faced Liocichla              | 40  | 0 | 0 | 0 | 0 | 0 | 30 | 0  | 30 | 0  | 0 | 0 | 50  | 50 | 0  | 0  | 0  | 49    |
| <i>Pomatorhinus erythrocnemis</i> | Black-streaked Scimitar Babbler  | 100 | 0 | 0 | 0 | 0 | 0 | 0  | 0  | 0  | 0  | 0 | 0 | 100 | 0  | 0  | 0  | 0  | 58.15 |
| <i>Pomatorhinus ruficollis</i>    | Streak-breasted Scimitar Babbler | 80  | 0 | 0 | 0 | 0 | 0 | 10 | 0  | 10 | 0  | 0 | 0 | 0   | 80 | 20 | 0  | 0  | 31.61 |
| <i>Chrysomma poecilotis</i>       | Baudo Guan                       | 100 | 0 | 0 | 0 | 0 | 0 | 0  | 0  | 0  | 0  | 0 | 0 | 0   | 50 | 50 | 0  | 0  | 18.71 |
| <i>Pteruthius flaviscapis</i>     | Blyth's Shrike Babbler           | 70  | 0 | 0 | 0 | 0 | 0 | 20 | 0  | 10 | 0  | 0 | 0 | 0   | 0  | 20 | 80 | 0  | 38.67 |
| <i>Pteruthius xanthochlorus</i>   | Green Shrike Babbler             | 60  | 0 | 0 | 0 | 0 | 0 | 20 | 0  | 20 | 0  | 0 | 0 | 0   | 0  | 60 | 40 | 0  | 14.3  |
| <i>Alcippe vinipectus</i>         | White-browed Fulvetta            | 80  | 0 | 0 | 0 | 0 | 0 | 10 | 0  | 10 | 0  | 0 | 0 | 0   | 70 | 30 | 0  | 0  | 11.95 |
| <i>Alcippe ruficapilla</i>        | Spectacled Fulvetta              | 80  | 0 | 0 | 0 | 0 | 0 | 0  | 0  | 20 | 0  | 0 | 0 | 0   | 50 | 50 | 0  | 0  | 13.16 |
| <i>Yuhina diademata</i>           | White-collared Yuhina            | 70  | 0 | 0 | 0 | 0 | 0 | 0  | 10 | 20 | 0  | 0 | 0 | 0   | 33 | 33 | 33 | 0  | 12    |
| <i>Yuhina occipitalis</i>         | Rufous-vented Yuhina             | 40  | 0 | 0 | 0 | 0 | 0 | 30 | 30 | 0  | 0  | 0 | 0 | 0   | 40 | 40 | 20 | 0  | 13    |
| <i>Conostoma oemodium</i>         | Brown-collared Brush-turkey      | 20  | 0 | 0 | 0 | 0 | 0 | 20 | 0  | 30 | 30 | 0 | 0 | 40  | 60 | 0  | 0  | 0  | 83.99 |
| <i>Dicaeum melanoxanthum</i>      | Black-fronted Piping-guan        | 70  | 0 | 0 | 0 | 0 | 0 | 10 | 10 | 0  | 10 | 0 | 0 | 0   | 0  | 20 | 60 | 20 | 8.46  |
| <i>Dicaeum ignipectus</i>         | Fire-breasted Flowerpecker       | 20  | 0 | 0 | 0 | 0 | 0 | 40 | 40 | 0  | 0  | 0 | 0 | 0   | 0  | 30 | 70 | 0  | 5.72  |
| <i>Aethopyga gouldiae</i>         | Mrs Gould's Sunbird              | 50  | 0 | 0 | 0 | 0 | 0 | 0  | 50 | 0  | 0  | 0 | 0 | 20  | 30 | 30 | 20 | 0  | 5     |
| <i>Aethopyga nipalensis</i>       | Green-tailed Sunbird             | 50  | 0 | 0 | 0 | 0 | 0 | 0  | 50 | 0  | 0  | 0 | 0 | 0   | 30 | 40 | 30 | 0  | 6.9   |
| <i>Passer rutilans</i>            | Russet Sparrow                   | 30  | 0 | 0 | 0 | 0 | 0 | 10 | 0  | 60 | 0  | 0 | 0 | 50  | 50 | 0  | 0  | 0  | 18.46 |
| <i>Passer montanus</i>            | Eurasian Tree Sparrow            | 40  | 0 | 0 | 0 | 0 | 0 | 0  | 0  | 60 | 0  | 0 | 0 | 33  | 33 | 33 | 0  | 0  | 21.39 |
| <i>Motacilla alba</i>             | White Wagtail                    | 100 | 0 | 0 | 0 | 0 | 0 | 0  | 0  | 0  | 0  | 0 | 0 | 100 | 0  | 0  | 0  | 0  | 23.93 |
| <i>Motacilla cinerea</i>          | Grey Wagtail                     | 100 | 0 | 0 | 0 | 0 | 0 | 0  | 0  | 0  | 0  | 0 | 0 | 100 | 0  | 0  | 0  | 0  | 17.15 |
| <i>Anthus hodgsoni</i>            | Olive-backed Pipit               | 100 | 0 | 0 | 0 | 0 | 0 | 0  | 0  | 0  | 0  | 0 | 0 | 100 | 0  | 0  | 0  | 0  | 21.3  |

|                                   |                                |     |   |   |   |   |   |    |    |     |    |   |   |   |     |    |    |    |   |       |
|-----------------------------------|--------------------------------|-----|---|---|---|---|---|----|----|-----|----|---|---|---|-----|----|----|----|---|-------|
| <i>Anthus sylvanus</i>            | Upland Pipit                   | 100 | 0 | 0 | 0 | 0 | 0 | 0  | 0  | 0   | 0  | 0 | 0 | 0 | 100 | 0  | 0  | 0  | 0 | 31    |
| <i>Prunella strophciata</i>       | Rufous-breasted Accentor       | 60  | 0 | 0 | 0 | 0 | 0 | 20 | 0  | 20  | 0  | 0 | 0 | 0 | 100 | 0  | 0  | 0  | 0 | 18.08 |
| <i>Carduelis ambigua</i>          | Black-headed Greenfinch        | 0   | 0 | 0 | 0 | 0 | 0 | 0  | 0  | 100 | 0  | 0 | 0 | 0 | 50  | 50 | 0  | 0  | 0 | 15.38 |
| <i>Uragus sibiricus</i>           | Long-tailed Rosefinch          | 10  | 0 | 0 | 0 | 0 | 0 | 20 | 0  | 40  | 30 | 0 | 0 | 0 | 40  | 30 | 30 | 0  | 0 | 17.43 |
| <i>Carpodacus nipalensis</i>      | Dark-breasted Rosefinch        | 0   | 0 | 0 | 0 | 0 | 0 | 40 | 10 | 40  | 10 | 0 | 0 | 0 | 0   | 50 | 50 | 0  | 0 | 22.1  |
| <i>Carpodacus erythrinus</i>      | Common Rosefinch               | 10  | 0 | 0 | 0 | 0 | 0 | 20 | 10 | 30  | 30 | 0 | 0 | 0 | 50  | 50 | 0  | 0  | 0 | 23.97 |
| <i>Carpodacus pulcherrimus</i>    | Himalayan Beautiful Rosefinch  | 0   | 0 | 0 | 0 | 0 | 0 | 0  | 0  | 50  | 50 | 0 | 0 | 0 | 50  | 50 | 0  | 0  | 0 | 19.2  |
| <i>Carpodacus thura</i>           | Chinese White-browed Rosefinch | 0   | 0 | 0 | 0 | 0 | 0 | 30 | 0  | 40  | 30 | 0 | 0 | 0 | 100 | 0  | 0  | 0  | 0 | 30.99 |
| <i>Pyrrhula nipalensis</i>        | Brown Bullfinch                | 0   | 0 | 0 | 0 | 0 | 0 | 20 | 10 | 40  | 30 | 0 | 0 | 0 | 0   | 40 | 20 | 40 | 0 | 24.6  |
| <i>Pyrrhula erythaca</i>          | Grey-headed Bullfinch          | 10  | 0 | 0 | 0 | 0 | 0 | 0  | 10 | 30  | 50 | 0 | 0 | 0 | 50  | 50 | 0  | 0  | 0 | 19    |
| <i>Mycerobas affinis</i>          | Collared Grosbeak              | 10  | 0 | 0 | 0 | 0 | 0 | 20 | 0  | 50  | 20 | 0 | 0 | 0 | 33  | 33 | 33 | 0  | 0 | 83    |
| <i>Mycerobas melanozanthos</i>    | Spot-winged Grosbeak           | 0   | 0 | 0 | 0 | 0 | 0 | 40 | 0  | 40  | 20 | 0 | 0 | 0 | 20  | 20 | 40 | 20 | 0 | 62    |
| <i>Mycerobas carripes</i>         | White-winged Grosbeak          | 10  | 0 | 0 | 0 | 0 | 0 | 60 | 0  | 30  | 0  | 0 | 0 | 0 | 0   | 33 | 33 | 33 | 0 | 58.84 |
| <i>Emberiza godlewskii</i>        | Rufous-headed Chachalaca       | 30  | 0 | 0 | 0 | 0 | 0 | 0  | 0  | 60  | 10 | 0 | 0 | 0 | 100 | 0  | 0  | 0  | 0 | 19    |
| <i>Emberiza elegans</i>           | Yellow-throated Bunting        | 30  | 0 | 0 | 0 | 0 | 0 | 0  | 0  | 60  | 10 | 0 | 0 | 0 | 0   | 20 | 60 | 20 | 0 | 16.84 |
| <i>Ficedula albicilla</i>         | Emu                            | 100 | 0 | 0 | 0 | 0 | 0 | 0  | 0  | 0   | 0  | 0 | 0 | 0 | 0   | 30 | 50 | 20 | 0 | 10.8  |
| <i>Certhia hodgsoni</i>           | Hodgson's Treecreeper          | 60  | 0 | 0 | 0 | 0 | 0 | 0  | 0  | 40  | 0  | 0 | 0 | 0 | 40  | 30 | 30 | 0  | 0 | 9     |
| <i>Phylloscopus claudiae</i>      | Southern Brown Kiwi            | 80  | 0 | 0 | 0 | 0 | 0 | 20 | 0  | 0   | 0  | 0 | 0 | 0 | 0   | 20 | 40 | 40 | 0 | 7.63  |
| <i>Phylloscopus ogilviegranti</i> | Black-billed Brush-turkey      | 100 | 0 | 0 | 0 | 0 | 0 | 0  | 0  | 0   | 0  | 0 | 0 | 0 | 0   | 20 | 20 | 60 | 0 | 6.4   |

**Table S3** The first two axes and Cumulative Proportion (%) from the principal component analysis of Diet and Forage trait.

| Scientific name                  | Diet-Comp.1 | Diet-Comp.2 | Forage-Comp.1 | Forage-Comp.2 |
|----------------------------------|-------------|-------------|---------------|---------------|
| <i>Ithaginis cruentus</i>        | -44.34      | -3.96       | 51.49         | -2.29         |
| <i>Pucrasia macrolopha</i>       | -49.42      | -3.90       | 71.65         | 13.99         |
| <i>Chrysolophus amherstiae</i>   | -20.55      | -1.20       | 71.65         | 13.99         |
| <i>Picumnus innominatus</i>      | 42.73       | 2.57        | -39.64        | -36.74        |
| <i>Dendrocopos hyperythrus</i>   | 14.19       | 0.66        | -48.86        | 33.07         |
| <i>Dendrocopos darjellensis</i>  | 42.73       | 2.57        | -42.00        | -0.36         |
| <i>Picus canus</i>               | 9.87        | -1.60       | 71.65         | 13.99         |
| <i>Upupa epops</i>               | 24.91       | 0.75        | 71.65         | 13.99         |
| <i>Cuculus sparverioides</i>     | 31.42       | -5.72       | -48.60        | 40.90         |
| <i>Cuculus canorus</i>           | 31.42       | -5.72       | -21.07        | 1.33          |
| <i>Psittacula derbiana</i>       | -76.21      | -11.23      | -42.00        | -0.36         |
| <i>Columba rupestris</i>         | -65.41      | 43.07       | 51.49         | -2.29         |
| <i>Columba leuconota</i>         | -75.81      | 43.98       | 51.49         | -2.29         |
| <i>Streptopelia orientalis</i>   | -71.38      | 11.72       | 71.65         | 13.99         |
| <i>Treron sphenurus</i>          | -70.35      | -80.31      | -24.76        | 29.25         |
| <i>Accipiter trivirgatus</i>     | -29.64      | -4.38       | -2.66         | -19.58        |
| <i>Accipiter virgatus</i>        | -29.64      | -4.38       | 11.27         | 19.61         |
| <i>Lanius tephronotus</i>        | 24.73       | 0.81        | 71.65         | 13.99         |
| <i>Garrulus glandarius</i>       | -25.24      | -12.09      | 27.13         | -6.30         |
| <i>Pica pica</i>                 | -34.93      | -5.31       | 40.67         | 3.55          |
| <i>Nucifraga caryocatactes</i>   | -41.24      | 34.88       | 3.29          | 5.35          |
| <i>Pyrrhocorax pyrrhocorax</i>   | -11.25      | 3.81        | 35.11         | 7.96          |
| <i>Corvus corone</i>             | -23.62      | 2.98        | 62.92         | 13.70         |
| <i>Corvus macrorhynchos</i>      | -37.17      | -12.62      | 71.65         | 13.99         |
| <i>Pericrocotus solaris</i>      | 42.73       | 2.57        | -47.57        | 72.23         |
| <i>Pericrocotus ethologus</i>    | 21.03       | -4.81       | -41.17        | 60.00         |
| <i>Pericrocotus brevirostris</i> | 21.94       | 4.38        | -42.00        | -0.36         |

|                                    |        |        |        |        |
|------------------------------------|--------|--------|--------|--------|
| <i>Chelidorhynx hypoxantha</i>     | 42.73  | 2.57   | -29.31 | -20.77 |
| <i>Rhipidura albicollis</i>        | 42.73  | 2.57   | -41.23 | -14.94 |
| <i>Dicrurus macrocercus</i>        | -14.84 | 2.72   | -37.52 | 25.53  |
| <i>Cinclus pallasii</i>            | 42.73  | 2.57   | 3.04   | 6.98   |
| <i>Monticola solitarius</i>        | -19.28 | -11.15 | 47.29  | 9.97   |
| <i>Myophonus caeruleus</i>         | -0.10  | -23.20 | 71.65  | 13.99  |
| <i>Zoothera dixonii</i>            | 7.64   | -8.48  | 71.65  | 13.99  |
| <i>Turdus merula</i>               | -13.63 | -3.68  | 27.13  | -6.30  |
| <i>Turdus rubrocanus</i>           | -13.81 | -38.87 | 23.44  | 21.62  |
| <i>Turdus mupinensis</i>           | -26.29 | -33.34 | 3.29   | 5.35   |
| <i>Ficedula hodgsonii</i>          | -13.81 | -38.87 | -39.64 | -36.74 |
| <i>Ficedula strophilata</i>        | 42.73  | 2.57   | -29.56 | -28.60 |
| <i>Ficedula hyperythra</i>         | 31.42  | -5.72  | -33.34 | -55.13 |
| <i>Ficedula westermanni</i>        | 42.73  | 2.57   | -48.60 | 40.90  |
| <i>Ficedula tricolor</i>           | 42.73  | 2.57   | -2.66  | -19.58 |
| <i>Ficedula sapphira</i>           | 42.73  | 2.57   | -39.64 | -36.74 |
| <i>Eumyias thalassinus</i>         | 8.81   | -22.29 | -24.76 | 29.25  |
| <i>Niltava sundara</i>             | 20.12  | -14.01 | 21.25  | -26.70 |
| <i>Cyornis banyumas</i>            | 42.73  | 2.57   | -39.64 | -36.74 |
| <i>Culicicapa ceylonensis</i>      | 42.73  | 2.57   | -42.81 | 6.85   |
| <i>Luscinia calliope</i>           | 21.94  | 4.38   | 21.25  | -26.70 |
| <i>Luscinia brunnea</i>            | 42.73  | 2.57   | 41.41  | -10.42 |
| <i>Tarsiger cyanurus</i>           | 18.94  | -0.19  | 21.25  | -26.70 |
| <i>Tarsiger chrysaeus</i>          | 42.73  | 2.57   | 21.25  | -26.70 |
| <i>Phoenicurus aureus</i>          | -5.10  | 20.06  | 21.25  | -26.70 |
| <i>Phoenicurus frontalis</i>       | 42.73  | 2.57   | -42.00 | -0.36  |
| <i>Chaimarrornis leucocephalus</i> | 18.94  | -0.19  | 51.49  | -2.29  |
| <i>Rhyacornis fuliginosa</i>       | 18.94  | -0.19  | 16.00  | -11.37 |
| <i>Hodgsonius phaenicuroides</i>   | -2.50  | -30.58 | 71.65  | 13.99  |
| <i>Saxicola torquatus</i>          | 10.16  | -0.92  | 71.65  | 13.99  |

|                                  |        |        |        |        |
|----------------------------------|--------|--------|--------|--------|
| <i>Saxicola ferreus</i>          | 30.25  | 8.10   | 49.39  | 3.84   |
| <i>Sitta nagaensis</i>           | 5.29   | 19.15  | 27.13  | -6.30  |
| <i>Sitta himalayensis</i>        | 5.29   | 19.15  | -45.17 | 5.15   |
| <i>Certhia himalayana</i>        | 30.25  | 8.10   | -30.89 | 1.03   |
| <i>Troglodytes troglodytes</i>   | 1.26   | -1.83  | 21.25  | -26.70 |
| <i>Cephalopyrus flammiceps</i>   | 3.79   | 1.56   | -44.91 | 12.98  |
| <i>Parus palustris</i>           | -15.24 | -2.05  | -45.94 | -18.35 |
| <i>Parus montanus</i>            | -4.84  | -2.95  | -45.94 | -18.35 |
| <i>Parus rubidiventris</i>       | 17.77  | 13.63  | -48.60 | 40.90  |
| <i>Parus ater</i>                | -21.03 | 13.23  | 71.65  | 13.99  |
| <i>Parus dichrous</i>            | 42.73  | 2.57   | -45.94 | -18.35 |
| <i>Parus major</i>               | -22.85 | -5.15  | -45.43 | -2.68  |
| <i>Parus monticolus</i>          | -15.24 | -2.05  | -42.81 | 6.85   |
| <i>Sylviparus modestus</i>       | 17.77  | 13.63  | -45.17 | 5.15   |
| <i>Aegithalos iouschistos</i>    | 11.55  | 5.28   | -38.36 | 2.42   |
| <i>Hirundo rupestris</i>         | 42.73  | 2.57   | 6.97   | -22.58 |
| <i>Delichon nipalense</i>        | 42.73  | 2.57   | -21.97 | 23.30  |
| <i>Pycnonotus xanthorrhous</i>   | -50.08 | -36.10 | 21.25  | -26.70 |
| <i>Hypsipetes leucocephalus</i>  | -41.44 | -31.59 | -46.24 | 42.61  |
| <i>Zosterops palpebrosus</i>     | -22.23 | -8.08  | -48.34 | 48.73  |
| <i>Phylloscopus fuscatus</i>     | 17.77  | 13.63  | -39.64 | -36.74 |
| <i>Phylloscopus affinis</i>      | 42.73  | 2.57   | 21.25  | -26.70 |
| <i>Phylloscopus subaffinis</i>   | 42.73  | 2.57   | -10.73 | 17.30  |
| <i>Phylloscopus armandii</i>     | 42.73  | 2.57   | -2.66  | -19.58 |
| <i>Phylloscopus pulcher</i>      | 24.58  | -0.25  | -48.60 | 40.90  |
| <i>Phylloscopus proregulus</i>   | 42.73  | 2.57   | -38.36 | 2.42   |
| <i>Phylloscopus inornatus</i>    | 30.25  | 8.10   | -30.89 | 1.03   |
| <i>Phylloscopus borealis</i>     | 42.73  | 2.57   | -38.36 | 2.42   |
| <i>Phylloscopus trochiloides</i> | 18.94  | -0.19  | -42.00 | -0.36  |
| <i>Phylloscopus magnirostris</i> | 42.73  | 2.57   | -48.08 | 56.57  |

|                                   |        |        |        |        |
|-----------------------------------|--------|--------|--------|--------|
| <i>Seicercus burkii</i>           | 42.73  | 2.57   | -50.14 | -6.09  |
| <i>Garrulax cineraceus</i>        | 7.64   | -8.48  | 71.65  | 13.99  |
| <i>Garrulax bieti</i>             | -13.81 | -38.87 | 71.65  | 13.99  |
| <i>Garrulax maximus</i>           | 21.94  | 4.38   | 49.39  | 3.84   |
| <i>Garrulax elliotii</i>          | 21.94  | 4.38   | 21.25  | -26.70 |
| <i>Garrulax affinis</i>           | -36.42 | -55.45 | 6.97   | -22.58 |
| <i>Liocichla phoenicea</i>        | -28.63 | -5.71  | 21.25  | -26.70 |
| <i>Pomatorhinus erythrocnemis</i> | 42.73  | 2.57   | 71.65  | 13.99  |
| <i>Pomatorhinus ruficollis</i>    | 18.94  | -0.19  | -33.34 | -55.13 |
| <i>Chrysomma poecilotis</i>       | 42.73  | 2.57   | -39.64 | -36.74 |
| <i>Pteruthius flaviscapis</i>     | 7.64   | -8.48  | -48.08 | 56.57  |
| <i>Pteruthius xanthochlorus</i>   | -4.84  | -2.95  | -49.11 | 25.24  |
| <i>Alcippe vinipectus</i>         | 18.94  | -0.19  | -35.44 | -49.00 |
| <i>Alcippe ruficapilla</i>        | 17.77  | 13.63  | -39.64 | -36.74 |
| <i>Yuhina diademata</i>           | 8.70   | 12.22  | -42.00 | -0.36  |
| <i>Yuhina occipitalis</i>         | -18.42 | -26.52 | -41.23 | -14.94 |
| <i>Conostoma oemodium</i>         | -48.51 | 5.29   | 11.17  | -34.84 |
| <i>Dicaeum melanoxanthum</i>      | 11.96  | -6.22  | -41.68 | 44.33  |
| <i>Dicaeum ignipectus</i>         | -38.80 | -36.22 | -48.34 | 48.73  |
| <i>Aethopyga gouldiae</i>         | -2.64  | -4.48  | -18.97 | -4.80  |
| <i>Aethopyga nipalensis</i>       | -2.64  | -4.48  | -43.07 | -0.98  |
| <i>Passer rutilans</i>            | -43.45 | 27.45  | 21.25  | -26.70 |
| <i>Passer montanus</i>            | -32.15 | 35.74  | -2.66  | -19.58 |
| <i>Motacilla alba</i>             | 42.73  | 2.57   | 71.65  | 13.99  |
| <i>Motacilla cinerea</i>          | 42.73  | 2.57   | 71.65  | 13.99  |
| <i>Anthus hodgsoni</i>            | 42.73  | 2.57   | 71.65  | 13.99  |
| <i>Anthus sylvanus</i>            | 42.73  | 2.57   | 71.65  | 13.99  |
| <i>Prunella strophiata</i>        | -4.84  | -2.95  | 71.65  | 13.99  |
| <i>Carduelis ambigua</i>          | -82.06 | 57.85  | 21.25  | -26.70 |
| <i>Uragus sibiricus</i>           | -60.99 | 10.82  | 4.87   | -16.45 |

|                                   |             |             |             |             |
|-----------------------------------|-------------|-------------|-------------|-------------|
| <i>Carpodacus nipalensis</i>      | -71.89      | -8.98       | -39.64      | -36.74      |
| <i>Carpodacus erythrinus</i>      | -57.58      | 3.88        | 21.25       | -26.70      |
| <i>Carpodacus pulcherrimus</i>    | -71.64      | 34.73       | 21.25       | -26.70      |
| <i>Carpodacus thura</i>           | -72.29      | 2.53        | 71.65       | 13.99       |
| <i>Pyrrhula nipalensis</i>        | -70.06      | 9.41        | -40.71      | 0.72        |
| <i>Pyrrhula erythaca</i>          | -55.76      | 22.26       | 21.25       | -26.70      |
| <i>Mycerobas affinis</i>          | -63.07      | 15.44       | -2.66       | -19.58      |
| <i>Mycerobas melanozanthos</i>    | -73.21      | -6.66       | -21.07      | 1.33        |
| <i>Mycerobas carnipes</i>         | -62.55      | -30.57      | -42.00      | -0.36       |
| <i>Emberiza godlewskii</i>        | -42.54      | 36.64       | 71.65       | 13.99       |
| <i>Emberiza elegans</i>           | -42.54      | 36.64       | -45.43      | -2.68       |
| <i>Ficedula albicilla</i>         | 42.73       | 2.57        | -43.33      | -8.81       |
| <i>Certhia hodgsoni</i>           | -7.19       | 24.68       | 4.87        | -16.45      |
| <i>Phylloscopus claudiae</i>      | 20.12       | -14.01      | -44.91      | 12.98       |
| <i>Phylloscopus ogilviegranti</i> | 42.73       | 2.57        | -44.40      | 28.64       |
| <b>Cumulative Proportion (%)</b>  | <b>0.67</b> | <b>0.83</b> | <b>0.65</b> | <b>0.85</b> |

---



**Table S4** Relationships between elevational distance and observed multiple dimensional  $\beta$ -diversity (i.e., taxonomic, phylogenetic, and functional  $\beta$ -diversity) based on liner regression models.

| Component                 | <b>S</b>  | <b>R<sup>2</sup></b> | <b>p</b> |
|---------------------------|-----------|----------------------|----------|
| $\beta_{\text{sim}}$      | 3.15E-04  | 0.69                 | <0.001   |
| $\beta_{\text{sne}}$      | -1.89E-05 | -0.02                | 0.23     |
| $\beta_{\text{sor}}$      | 2.96E-04  | 0.87                 | <0.001   |
| $\beta_{\text{phylosim}}$ | 2.20E-04  | 0.59                 | <0.001   |
| $\beta_{\text{phylosne}}$ | 7.23E-06  | -0.03                | 0.3      |
| $\beta_{\text{phylosor}}$ | 2.32E-04  | 0.71                 | <0.001   |
| $\beta_{\text{functsim}}$ | 3.99E-05  | 0.04                 | 0.03     |
| $\beta_{\text{functne}}$  | -1.39E-05 | -0.03                | 0.109    |
| $\beta_{\text{functsor}}$ | 2.60E-05  | -0.002               | 0.38     |

**Table S5** Relationships between elevational distance and standardized multiple dimensional  $\beta$ -diversity (i.e., taxonomic, phylogenetic, and functional  $\beta$ -diversity) based on liner regression models.

|                          | <b>S</b>  | <b>R<sup>2</sup></b> | <b>p</b> |
|--------------------------|-----------|----------------------|----------|
| ses. $\beta$ sim         | 4.97E-03  | 0.69                 | <0.001   |
| ses. $\beta$ sne         | -7.45E-04 | -0.03                | 0.29     |
| ses. $\beta$ sor         | 5.25E-03  | 0.87                 | <0.001   |
| ses. $\beta$<br>phylosim | 3.66E-03  | 0.58                 | <0.001   |
| ses. $\beta$<br>phylosne | 1.24E-04  | -0.04                | 0.612    |
| ses. $\beta$<br>phylosor | 4.15E-03  | 0.69                 | <0.001   |
| ses. $\beta$ functsim    | 8.27E-04  | 0.02                 | 0.09     |
| ses. $\beta$ functne     | -2.60E-04 | -0.03                | 0.15     |
| ses. $\beta$ functsor    | 6.10E-04  | 0.03                 | 0.01     |

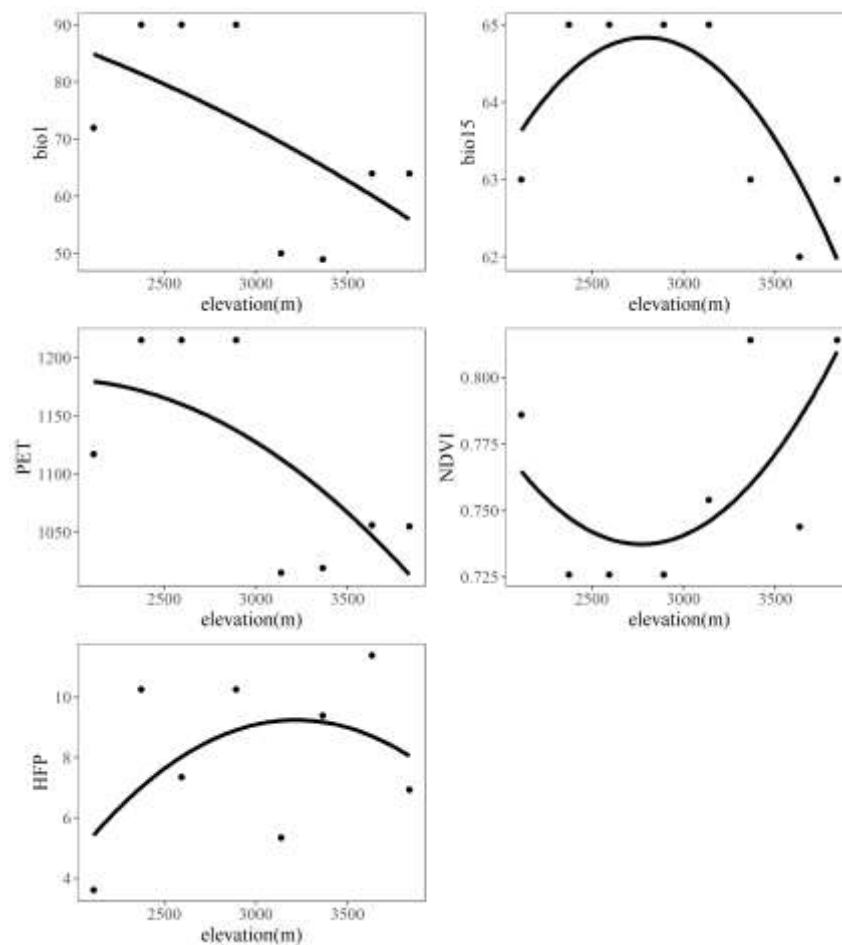

**Figure S1** Relationships between elevational and environmental variables. bio1: annual mean temperature; bio15: precipitation seasonality; HFP: human footprints; NDVI: normalized difference vegetation index; PET: potential evapotranspiration.
